# Supplementary material
Source: PubMed Central journal article supplement (PMC3865923)
Supplement: NIHMS505446-supplement-02.pdf [file NIHMS505446-supplement-02.pdf]

**Supplementary Table 1. Association between candidate gene SNPs and renal disease, adjusted for ancestry\***

| Gene         | Chrom.   | SNP              | Position         | Minor allele | N alleles   | OR          | Lower 95%   | Upper 95%   | P-value      |
|--------------|----------|------------------|------------------|--------------|-------------|-------------|-------------|-------------|--------------|
| FCGR2A       | 1        | rs1801274        | 159746369        | A            | 1462        | 1.13        | 0.96        | 1.32        | 0.135        |
| FCGR2A       | 1        | rs12128686       | 159785381        | G            | 1459        | 0.94        | 0.71        | 1.24        | 0.645        |
| STAT4        | 2        | rs6740131        | 191597827        | G            | 1464        | 0.96        | 0.80        | 1.15        | 0.656        |
| <b>STAT4</b> | <b>2</b> | <b>rs3024912</b> | <b>191601332</b> | <b>C</b>     | <b>1466</b> | <b>1.26</b> | <b>1.07</b> | <b>1.49</b> | <b>0.007</b> |
| STAT4        | 2        | rs3024896        | 191604961        | A            | 1463        | 1.16        | 0.95        | 1.41        | 0.147        |
| <b>STAT4</b> | <b>2</b> | <b>rs925847</b>  | <b>191605785</b> | <b>A</b>     | <b>1460</b> | <b>1.21</b> | <b>1.03</b> | <b>1.43</b> | <b>0.024</b> |
| STAT4        | 2        | rs3821236        | 191611003        | A            | 1458        | 1.03        | 0.87        | 1.22        | 0.754        |
| STAT4        | 2        | rs16833215       | 191622044        | G            | 1464        | 1.06        | 0.90        | 1.24        | 0.512        |
| STAT4        | 2        | rs7601754        | 191648696        | G            | 1465        | 1.00        | 0.82        | 1.22        | 0.986        |
| STAT4        | 2        | rs10931481       | 191663097        | G            | 1458        | 1.04        | 0.88        | 1.22        | 0.648        |
| STAT4        | 2        | rs7574865        | 191672878        | A            | 1459        | 1.04        | 0.88        | 1.24        | 0.648        |
| STAT4        | 2        | rs6752770        | 191681808        | G            | 1466        | 1.14        | 0.96        | 1.34        | 0.140        |
| STAT4        | 2        | rs6738544        | 191697601        | A            | 1452        | 1.01        | 0.86        | 1.19        | 0.891        |
| STAT4        | 2        | rs1551443        | 191704763        | A            | 1459        | 1.06        | 0.90        | 1.24        | 0.503        |
| STAT4        | 2        | rs2356350        | 191710783        | G            | 1462        | 1.06        | 0.91        | 1.24        | 0.461        |
| STAT4        | 2        | rs7596818        | 191717555        | A            | 1448        | 1.11        | 0.92        | 1.34        | 0.291        |
| STAT4        | 2        | rs7572482        | 191723317        | A            | 1466        | 1.01        | 0.86        | 1.18        | 0.955        |
| TREX1        | 3        | rs730566         | 48462052         | A            | 1465        | 1.04        | 0.87        | 1.24        | 0.669        |

|                  |          |                  |                  |          |             |             |             |             |              |
|------------------|----------|------------------|------------------|----------|-------------|-------------|-------------|-------------|--------------|
| PXK              | 3        | rs13098114       | 58173755         | G        | 1465        | 1.00        | 0.84        | 1.19        | 0.998        |
| PXK              | 3        | rs7636513        | 58186123         | G        | 1462        | 1.07        | 0.89        | 1.29        | 0.446        |
| PXK              | 3        | rs6445961        | 58207699         | A        | 1460        | 1.00        | 0.84        | 1.18        | 0.955        |
| PXK              | 3        | rs6769100        | 58235039         | G        | 1461        | 0.98        | 0.83        | 1.15        | 0.771        |
| PXK              | 3        | rs3773010        | 58244791         | A        | 1464        | 1.11        | 0.94        | 1.31        | 0.218        |
| PXK              | 3        | rs7622497        | 58257713         | C        | 1463        | 0.91        | 0.76        | 1.09        | 0.292        |
| PXK              | 3        | rs7625655        | 58312763         | G        | 1465        | 0.94        | 0.77        | 1.15        | 0.538        |
| PXK              | 3        | rs6445975        | 58345217         | C        | 1462        | 1.01        | 0.86        | 1.19        | 0.885        |
| PXK              | 3        | rs11710823       | 58371533         | A        | 1465        | 1.04        | 0.87        | 1.25        | 0.643        |
| PXK              | 3        | rs6767498        | 58384166         | A        | 1465        | 1.01        | 0.85        | 1.19        | 0.932        |
| TNFAIP3          | 6        | rs13192841       | 138008907        | A        | 1412        | 0.89        | 0.73        | 1.08        | 0.247        |
| TNFAIP3          | 6        | rs2230926        | 138237759        | C        | 1463        | 0.92        | 0.73        | 1.18        | 0.518        |
| TNFAIP3          | 6        | rs661561         | 138239024        | A        | 1463        | 1.05        | 0.88        | 1.24        | 0.600        |
| TNFAIP3          | 6        | rs610604         | 138241110        | C        | 1461        | 1.06        | 0.90        | 1.26        | 0.478        |
| TNFAIP3          | 6        | rs6922466        | 138486623        | G        | 1461        | 0.95        | 0.78        | 1.16        | 0.602        |
| TNFAIP3          | 6        | rs12660547       | 138489755        | G        | 1464        | 0.92        | 0.77        | 1.11        | 0.394        |
| <b>HLA</b>       |          |                  |                  |          |             |             |             |             |              |
| <b>DRB1*0301</b> | <b>6</b> |                  |                  |          | <b>1110</b> | <b>1.43</b> | <b>1.10</b> | <b>1.85</b> | <b>0.007</b> |
| <b>HLA</b>       |          |                  |                  |          |             |             |             |             |              |
| <b>DRB1*1501</b> | <b>6</b> |                  |                  |          | <b>1110</b> | <b>1.53</b> | <b>1.16</b> | <b>2.01</b> | <b>0.002</b> |
| IRF5             | 7        | rs729302         | 128356196        | C        | 1464        | 0.85        | 0.70        | 1.02        | 0.084        |
| <b>IRF5</b>      | <b>7</b> | <b>rs4728142</b> | <b>128361203</b> | <b>A</b> | <b>1464</b> | <b>1.20</b> | <b>1.03</b> | <b>1.41</b> | <b>0.023</b> |
| IRF5             | 7        | rs7808907        | 128371320        | A        | 1462        | 0.95        | 0.81        | 1.11        | 0.508        |

|             |          |                   |                  |          |             |             |             |             |              |
|-------------|----------|-------------------|------------------|----------|-------------|-------------|-------------|-------------|--------------|
| IRF5        | 7        | rs10488631        | 128381419        | G        | 1464        | 1.19        | 0.95        | 1.49        | 0.141        |
| <b>IRF5</b> | <b>7</b> | <b>rs2293492</b>  | <b>128402302</b> | <b>G</b> | <b>1466</b> | <b>0.71</b> | <b>0.52</b> | <b>0.98</b> | <b>0.036</b> |
| BLK         | 8        | rs12680762        | 11369436         | A        | 1459        | 1.12        | 0.94        | 1.35        | 0.211        |
| <b>BLK</b>  | <b>8</b> | <b>rs17799348</b> | <b>11370931</b>  | <b>A</b> | <b>1464</b> | <b>0.80</b> | <b>0.68</b> | <b>0.94</b> | <b>0.007</b> |
| BLK         | 8        | rs1564267         | 11375297         | A        | 1465        | 0.90        | 0.74        | 1.10        | 0.300        |
| <b>BLK</b>  | <b>8</b> | <b>rs2736340</b>  | <b>11381382</b>  | <b>A</b> | <b>1465</b> | <b>1.27</b> | <b>1.06</b> | <b>1.51</b> | <b>0.008</b> |
| BLK         | 8        | rs7829381         | 11381982         | G        | 1466        | 0.85        | 0.71        | 1.02        | 0.083        |
| BLK         | 8        | rs4606022         | 11392342         | G        | 1466        | 0.87        | 0.71        | 1.06        | 0.167        |
| BLK         | 8        | rs2618479         | 11393230         | A        | 1464        | 0.82        | 0.64        | 1.04        | 0.100        |
| BLK         | 8        | rs11776834        | 11401359         | G        | 1457        | 0.86        | 0.64        | 1.16        | 0.338        |
| BLK         | 8        | rs6993775         | 11407398         | C        | 1461        | 1.03        | 0.84        | 1.27        | 0.754        |
| BLK         | 8        | rs4841548         | 11412188         | G        | 1464        | 0.93        | 0.76        | 1.14        | 0.469        |
| BLK         | 8        | rs12677843        | 11424598         | A        | 1466        | 1.17        | 0.98        | 1.39        | 0.088        |
| BLK         | 8        | rs7014565         | 11434227         | A        | 1464        | 0.93        | 0.72        | 1.21        | 0.602        |
| <b>BLK</b>  | <b>8</b> | <b>rs3816668</b>  | <b>11444002</b>  | <b>G</b> | <b>1464</b> | <b>0.82</b> | <b>0.69</b> | <b>0.97</b> | <b>0.019</b> |
| TRAF/C5     | 9        | rs2900180         | 122746203        | A        | 1463        | 0.88        | 0.75        | 1.04        | 0.142        |
| KIAA1542/IR |          |                   |                  |          |             |             |             |             |              |
| F7          | 11       | rs936469          | 596749           | A        | 1464        | 1.09        | 0.90        | 1.33        | 0.390        |
| KIAA1542/IR |          |                   |                  |          |             |             |             |             |              |
| F7          | 11       | rs12421158        | 599888           | G        | 1373        | 0.98        | 0.79        | 1.21        | 0.828        |
| IRF7        | 11       | rs3758650         | 606865           | A        | 1459        | 1.18        | 0.83        | 1.67        | 0.363        |
| IRF7        | 11       | rs7932167         | 610599           | C        | 1445        | 1.11        | 0.94        | 1.32        | 0.222        |
| ITGAM-      | 16       | rs4889640         | 31171768         | C        | 1442        | 0.91        | 0.76        | 1.08        | 0.286        |

|               |           |                  |                 |          |             |             |             |             |              |
|---------------|-----------|------------------|-----------------|----------|-------------|-------------|-------------|-------------|--------------|
| ITGAX         |           |                  |                 |          |             |             |             |             |              |
| <b>ITGAM-</b> |           |                  |                 |          |             |             |             |             |              |
| <b>ITGAX</b>  | <b>16</b> | <b>rs9937837</b> | <b>31206440</b> | <b>C</b> | <b>1462</b> | <b>1.36</b> | <b>1.13</b> | <b>1.63</b> | <b>0.001</b> |
| ITGAM-        |           |                  |                 |          |             |             |             |             |              |
| ITGAX         | 16        | rs1143683        | 31244389        | A        | 1461        | 1.10        | 0.90        | 1.35        | 0.340        |
| ITGAM-        |           |                  |                 |          |             |             |             |             |              |
| ITGAX         | 16        | rs3925075        | 31255249        | G        | 1462        | 0.94        | 0.81        | 1.10        | 0.456        |
| ITGAM-        |           |                  |                 |          |             |             |             |             |              |
| ITGAX         | 16        | rs2929           | 31300809        | A        | 1425        | 1.15        | 0.96        | 1.39        | 0.127        |
| TREX2         | 23        | rs2980025        | 152361040       | A        | 1446        | 1.09        | 0.92        | 1.29        | 0.334        |
| MeCP2         | 23        | rs2239464        | 153001625       | A        | 1461        | 1.14        | 0.96        | 1.34        | 0.133        |

---

\*Adjusted for ancestry using first 3 principal components.
